# Supplementary material for: Investigation of the substitution effect on poly(bis-3,4-ethylenedioxythiophene methine)s through solid state polymerization
Source: Royal Society of Chemistry journal article supplement (doi:10.1039/c5ra21122k), 2015-01-01
Supplement: c5ra21122k1.pdf [file c5ra21122k1.pdf]

Electronic Supporting Information  
*For*

**Investigation of Substitution Effect on Poly(bis-3,4-  
ethylenedioxythiophene methine)s through Solid State  
Polymerization**

Kai Peng, Tong Pei, Zhaoxiang Li, Lili Huang, Jiangbin Xia

*College of Chemistry and Molecular Science, Wuhan University, Wuhan 430072, China*

Corresponding author. E-mail: jbxia@whu.edu.cn

Tel & Fax: 86-27-67856707

## **Contents**

1.  $^1\text{H}$ -NMR and  $^{13}\text{C}$ -NMR spectra of the compounds.(Fig. S1- Fig. S10).
2. Table S1 Details of the Data Collection and Structure Refinements for All Complexes Reported in This Work
3. Table S2.  $T_{\text{onset}}$  of SSP and I/I Distance derived from those monomers (Å)

# 1. <sup>1</sup>H-NMR and <sup>13</sup>C-NMR spectra of the compounds

**Figure S1.** <sup>1</sup>H NMR (CDCl<sub>3</sub>) spectrum of I<sub>2</sub>-Pr-EDOT

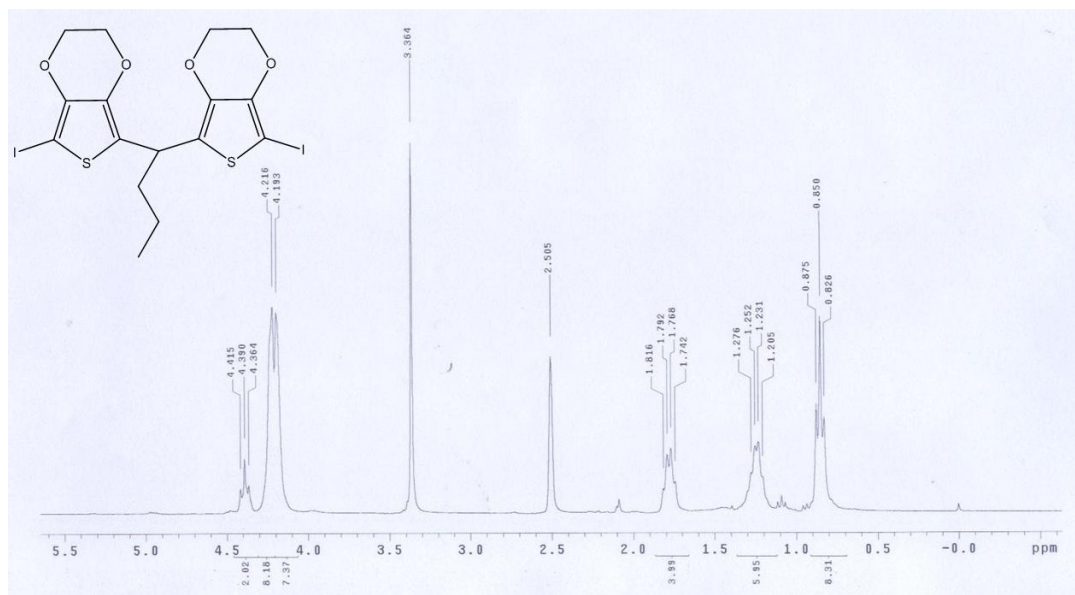

**Figure S2.** <sup>13</sup>C NMR (CDCl<sub>3</sub>) spectrum of I<sub>2</sub>-Pr-EDOT

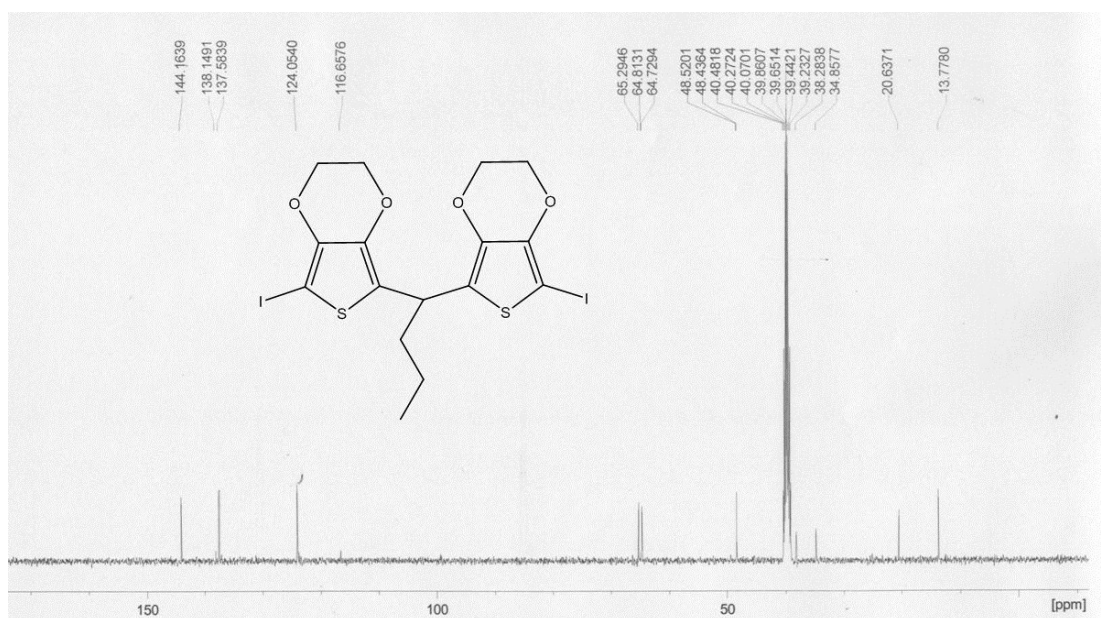

**Figure S3.**  $^1\text{H}$  NMR ( $\text{CDCl}_3$ ) spectrum of  $\text{I}_2\text{-Ph-EDOT}$

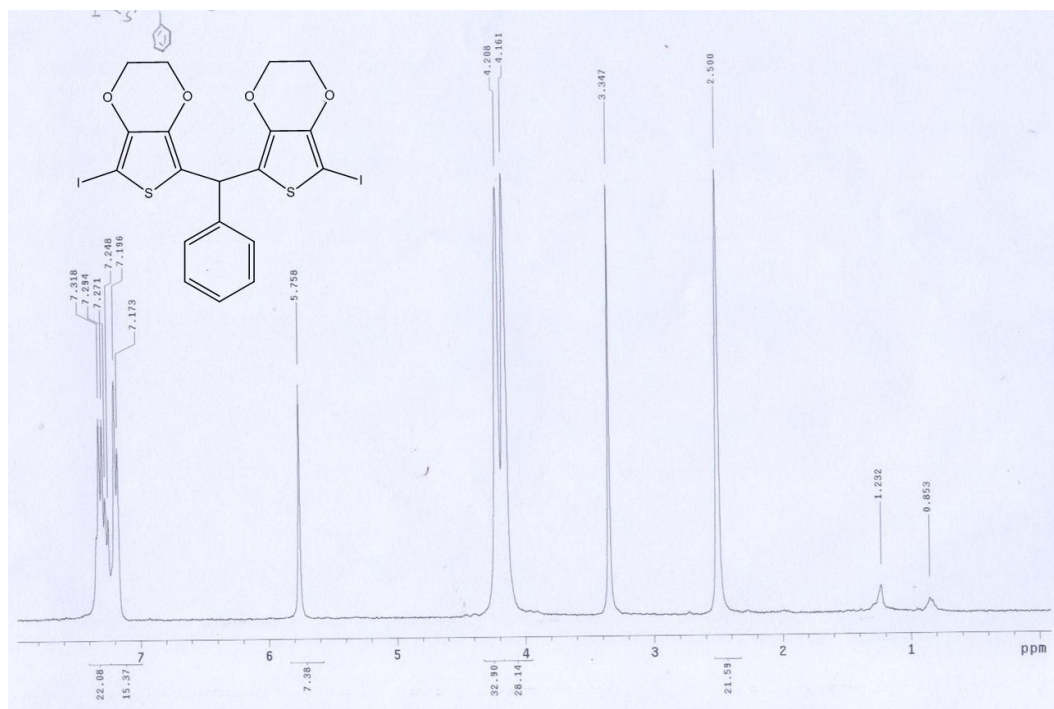

**Figure S4.**  $^{13}\text{C}$  NMR ( $\text{CDCl}_3$ ) spectrum of  $\text{I}_2\text{-Ph-EDOT}$

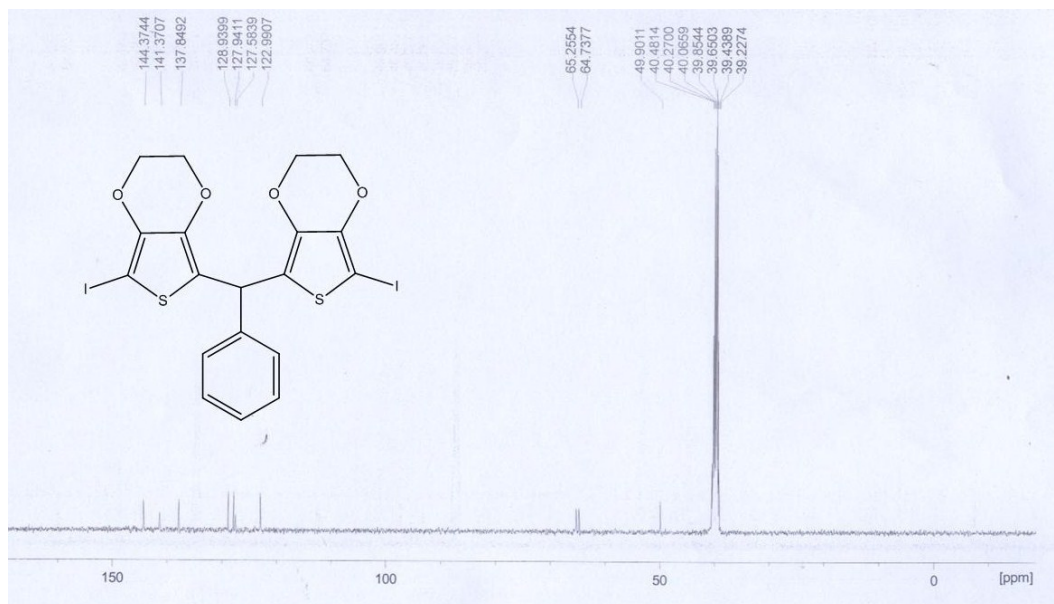

**Figure S5.**  $^1\text{H}$  NMR ( $\text{CDCl}_3$ ) spectrum of  $\text{I}_2\text{-Naph-EDOT}$

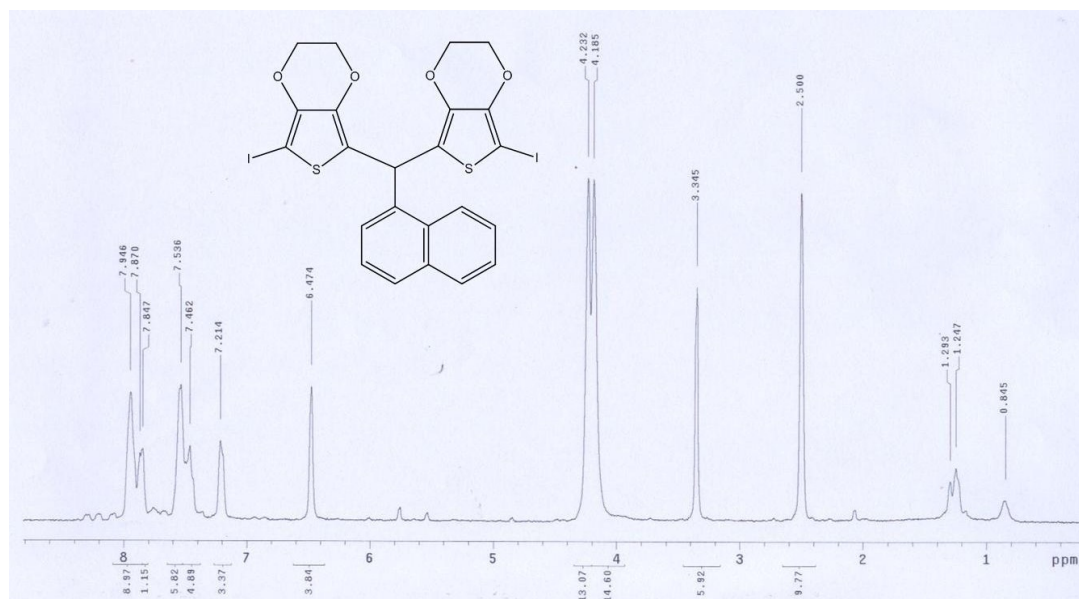

**Figure S6.**  $^{13}\text{C}$  NMR ( $\text{CDCl}_3$ )  $\text{I}_2\text{-Naph-EDOT}$

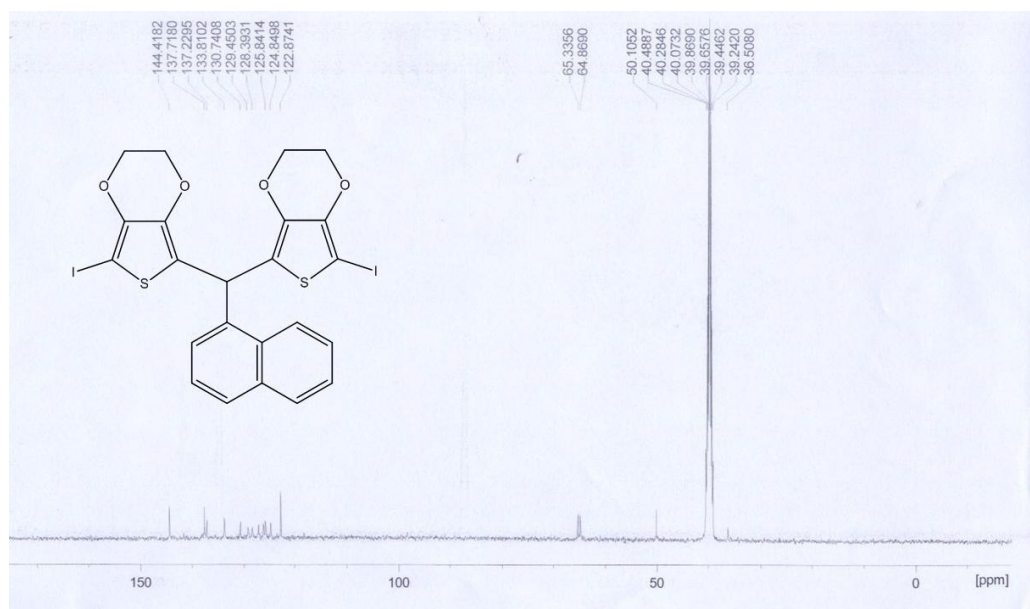



**Figure S7.**  $^1\text{H}$  NMR ( $\text{CDCl}_3$ ) spectrum of  $\text{I}_2$ -Triph-EDOT

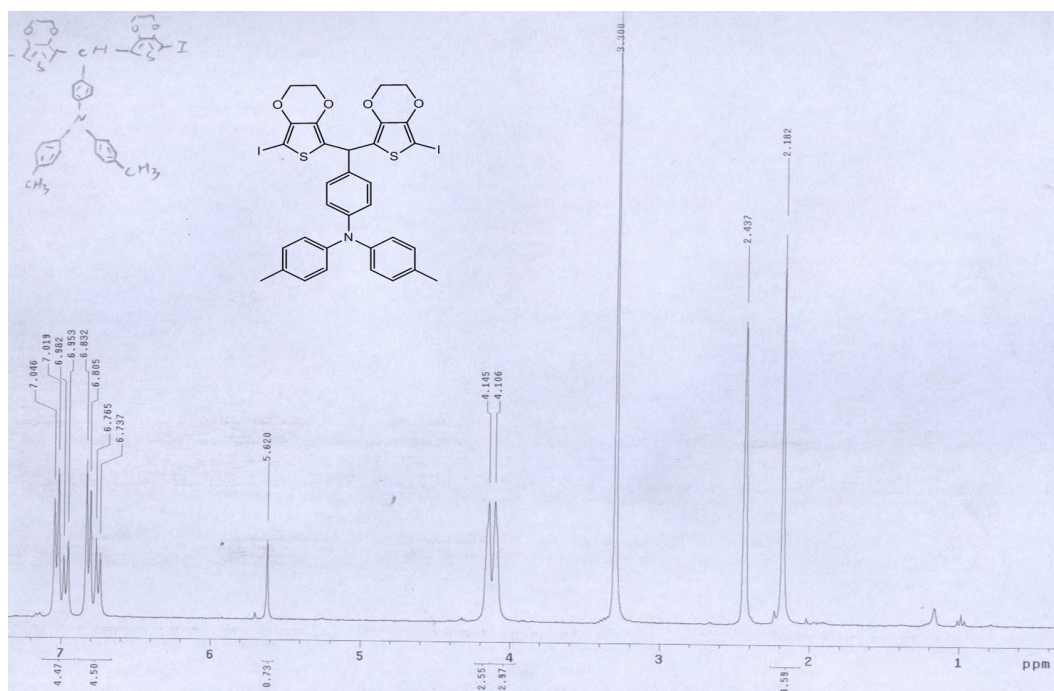

**Figure S8.**  $^{13}\text{C}$  NMR ( $\text{CDCl}_3$ ) spectrum of  $\text{I}_2$ -Triph-EDOT

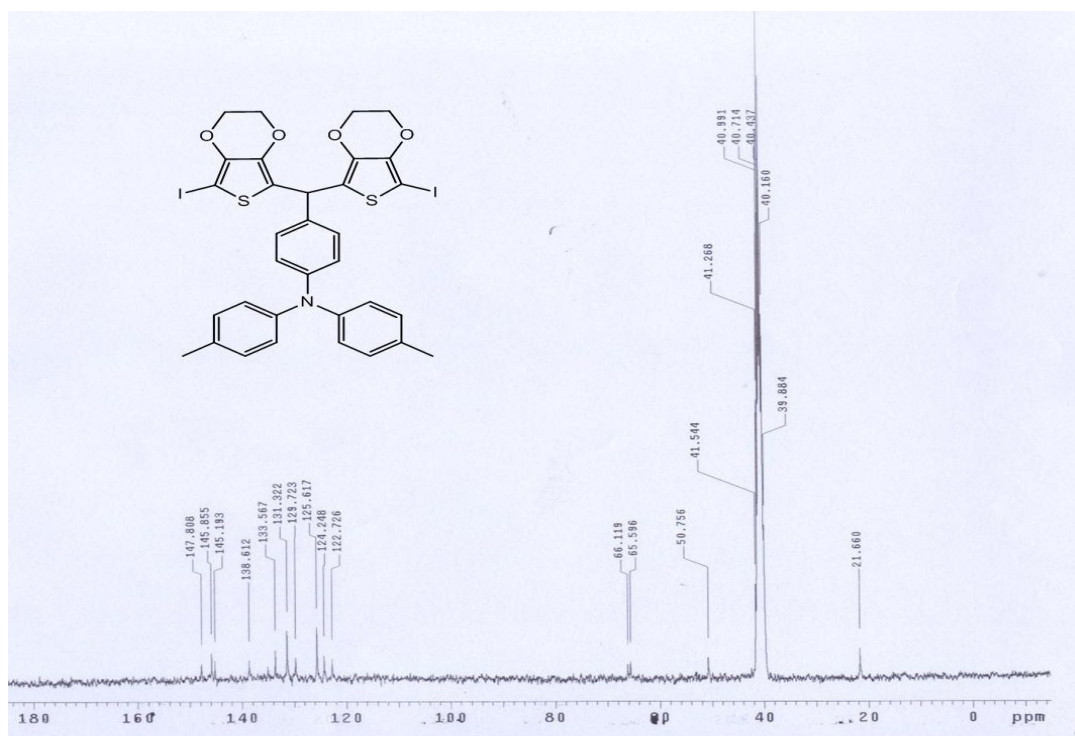

**Table S1** Details of the Data Collection and Structure Refinements for All Complexes Reported in This Work

| parameter                               | I <sub>2</sub> -Ph-EDOT                                                      | I <sub>2</sub> -Nap-EDOT                                                     | I <sub>2</sub> -Pr-EDOT                                                      |
|-----------------------------------------|------------------------------------------------------------------------------|------------------------------------------------------------------------------|------------------------------------------------------------------------------|
| empirical formula                       | C <sub>19</sub> H <sub>14</sub> I <sub>2</sub> O <sub>4</sub> S <sub>2</sub> | C <sub>23</sub> H <sub>16</sub> I <sub>2</sub> O <sub>4</sub> S <sub>2</sub> | C <sub>16</sub> H <sub>16</sub> I <sub>2</sub> O <sub>4</sub> S <sub>2</sub> |
| fw                                      | 624.22                                                                       | 674.28                                                                       | 590.21                                                                       |
| cryst syst                              | Orthorhombic                                                                 | Monoclinic                                                                   | Monoclinic                                                                   |
| space group                             | P 2 <sub>1</sub> 2 <sub>1</sub> 2 <sub>1</sub>                               | P 21/c                                                                       | P2(1)/c                                                                      |
| a (Å)                                   | 16.0830(7)                                                                   | 16.947(2)                                                                    | 8.5162(5)                                                                    |
| b (Å)                                   | 16.083                                                                       | 9.1615(13)                                                                   | 7.9870(5)                                                                    |
| c (Å)                                   | 7.8168(4)                                                                    | 15.240(2)                                                                    | 27.2258(15)                                                                  |
| α (deg)                                 | 90.00                                                                        | 90.00                                                                        | 90.00                                                                        |
| β (deg)                                 | 90.00                                                                        | 106.051(4)                                                                   | 93.3900(10)                                                                  |
| γ (deg)                                 | 90.00                                                                        | 90.00                                                                        | 90.00                                                                        |
| V (Å <sup>3</sup> )                     | 2021.92(14)                                                                  | 2273.9(5)                                                                    | 1848.63(19)                                                                  |
| Z                                       | 4                                                                            | 4                                                                            | 4                                                                            |
| D <sub>calcd</sub> (g/cm <sup>3</sup> ) | 2.051                                                                        | 1.970                                                                        | 2.121                                                                        |
| cryst size (mm <sup>3</sup> )           | 0.2×0.15×0.10                                                                | 0.2×0.10×0.10                                                                | 0.12×0.10×0.10                                                               |
| diffractometer                          | Bruker APEX-II<br>CCD                                                        | Bruker APEX-II<br>CCD                                                        | Bruker APEX-<br>II CCD                                                       |
| F(000)                                  | 1192                                                                         | 1296                                                                         | 1128.0                                                                       |
| T (K)                                   | 293(2)                                                                       | 293(2)                                                                       | 100(2)                                                                       |
| θ <sub>max</sub>                        | 25.990                                                                       | 28.350                                                                       | 29.99                                                                        |
| reflns collected                        | 2340                                                                         | 5642                                                                         | 5351                                                                         |
| indep reflns                            | 2304                                                                         | 3338                                                                         | 4991                                                                         |
| param refined                           | 244                                                                          | 280                                                                          | 218                                                                          |
| R <sub>1</sub> , wR <sub>2</sub>        | 0.0184, 0.0440                                                               | 0.0735, 0.2114                                                               | 0.0264, 0.1031                                                               |
| GOF (F2)                                | 1.050                                                                        | 1.063                                                                        | 1.255                                                                        |

**3. Table S2.  $T_{\text{onset}}$  of SSP and I/I Distance derived from those monomers (Å)**

| monomers                                                                            | effective I/I distance | shortest I/I distance | $T_{\text{onset}}$ | Reference |
|-------------------------------------------------------------------------------------|------------------------|-----------------------|--------------------|-----------|
| 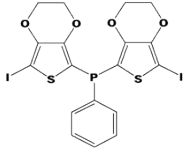   | 4.527                  | 4.092                 | 80                 | 1         |
|    | 4.805                  | 4.131                 | 95                 | 2         |
|    | 5.479                  | 4.134                 | 80                 | 2         |
|    | 4.308                  | 4.308                 | 75                 | 3         |
|   | 4.242                  | 4.055                 | 85                 | 3         |
|  | 4.878                  | 4.267                 | 70                 | This work |
|  | 4.374                  | 4.374                 | 85                 | This work |
|  | 5.375                  | 5.242                 | 110                | This work |

1. C. Tusy, L. Huang, K. Peng and J. Xia, *RSC Adv.*, 2014, **4**, 29032

2. C. Tusy, L. Huang, K. Peng and J. Xia *RSC Adv.*, 2015, **5**, 16292.

3. L. Huang, K. Peng, Tong Pei, and J. Xia *RSC Adv.*, 2015, **5**, 70417.
